# Supplementary material for: Large-Scale Spatio-Temporal Patterns of Mediterranean Cephalopod Diversity
Source: PubMed Central journal article supplement (PMC4712019; doi:10.1371/journal.pone.0146469), 2016-01-13
Supplement: pone.0146469.s004.pdf [file pone.0146469.s004.pdf]

Table S1: List of all species found during MEDITS, by area. Numbers are frequency of occurrence averaged from 1994-2012. Species marked in grey were excluded from the modeling. *Alloteuthis media*, *Alloteuthis subulata* and *Alloteuthis* sp. were joined for the analysis.

| Species                                                      | Iberian-Lions | Tyrrhenian | Ionian | Adriatic | Aegean | Strait of Sicily |
|--------------------------------------------------------------|---------------|------------|--------|----------|--------|------------------|
| <b>Order SEPIIDA</b>                                         |               |            |        |          |        |                  |
| <b>Family Sepiidae</b>                                       |               |            |        |          |        |                  |
| <i>Sepia elegans</i> Blainville, 1827                        | 28.84         | 23.13      | 29.76  | 31.93    | 38.94  | 26.42            |
| <i>Sepia officinalis</i> Linneus, 1758                       | 6.79          | 6.54       | 3.76   | 9.17     | 15.83  | 9.50             |
| <i>Sepia orbignyana</i> Férussac, 1826                       | 20.69         | 28.40      | 14.08  | 14.58    | 55.28  | 20.01            |
| <i>Sepia</i> spp.                                            | 0.23          | 0.56       | 0.00   | 0.35     | 0.00   | 2.16             |
| <b>Family Sepiolidae</b>                                     |               |            |        |          |        |                  |
| <i>Sepiola affinis</i> Naef, 1912                            | 0.15          | 0.05       | 0.14   | 0.41     | 0.00   | 0.29             |
| <i>Sepiola intermedia</i> Naef, 1912                         | 0.75          | 0.43       | 4.04   | 1.23     | 0.25   | 2.45             |
| <i>Sepiola ligulata</i> Naef, 1912                           | 0.08          | 0.38       | 1.39   | 0.71     | 0.00   | 0.00             |
| <i>Sepiola robusta</i> Naef, 1912                            | 0.40          | 0.14       | 0.91   | 2.79     | 0.00   | 0.00             |
| <i>Sepiola rondeleti</i> Leach, 1817                         | 0.03          | 0.74       | 0.77   | 0.24     | 0.00   | 0.36             |
| <i>Sepiola</i> spp.                                          | 17.05         | 9.35       | 2.37   | 18.67    | 5.53   | 14.33            |
| <i>Rondeletiola minor</i> Naef, 1912                         | 8.02          | 11.89      | 19.09  | 8.50     | 2.26   | 5.04             |
| <i>Sepietta obscura</i> Naef, 1916                           | 0.05          | 0.58       | 0.00   | 0.54     | 0.00   | 0.00             |
| <i>Sepietta neglecta</i> Naef, 1916                          | 0.20          | 0.37       | 0.07   | 1.21     | 0.00   | 0.00             |
| <i>Sepietta oweniana</i> (D'Orbigny in Férussac & d'Orbigny) | 20.87         | 29.16      | 21.46  | 9.54     | 3.02   | 17.85            |
| <i>Sepietta</i> spp.                                         | 0.05          | 4.03       | 0.14   | 7.59     | 0.00   | 0.29             |
| <b>Unid. Sepiolinae</b>                                      | 0.00          | 0.00       | 0.00   | 0.00     | 18.34  | 4.39             |

|                                                        |       |       |       |       |       |       |
|--------------------------------------------------------|-------|-------|-------|-------|-------|-------|
| <i>Rossia macrosoma</i> (Delle Chiaje, 1830)           | 10.56 | 14.29 | 11.08 | 5.32  | 17.59 | 11.52 |
| <i>Neorossia caroli</i> (Joubin, 1902)                 | 3.87  | 7.40  | 5.09  | 1.77  | 2.01  | 4.18  |
| <i>Heteroteuthis dispar</i> (Ruppell, 1844)            | 2.34  | 2.70  | 5.51  | 0.28  | 1.51  | 0.50  |
| <i>Stoloteuthis leucoptera</i> (Verrill, 1878)         | 0.63  | 0.24  | 0.00  | 0.00  | 0.00  | 0.00  |
|                                                        |       |       |       |       |       |       |
| <b>ORDER MYOPSIDA</b>                                  |       |       |       |       |       |       |
| <b>Family Loliginidae</b>                              |       |       |       |       |       |       |
| <i>Alloteuthis media</i> (Linnaeus, 1758) <sup>1</sup> | 52.25 | 21.99 | 30.10 | 66.32 | 14.07 | 37.15 |
| <i>Alloteuthis subulata</i> Lamarck, 1798 <sup>1</sup> | 27.58 | 3.87  | 2.44  | 7.83  | 0.25  | 11.45 |
| <i>Alloteuthis spp.</i> <sup>1</sup>                   | 3.60  | 10.61 | 0.00  | 0.02  | 27.64 | 2.16  |
| <i>Loligo forbesii</i> Steenstrup, 1856                | 3.65  | 15.51 | 5.02  | 0.67  | 28.64 | 5.33  |
| <i>Loligo vulgaris</i> Lamarck, 1798                   | 13.08 | 16.58 | 15.05 | 36.97 | 24.62 | 17.64 |
| <i>Loligo spp.</i>                                     | 1.63  | 0.66  | 0.00  | 0.00  | 1.51  | 0.00  |
| <b>ORDER OEGOPSIDA</b>                                 |       |       |       |       |       |       |
| <b>Family Ommastrephidae</b>                           |       |       |       |       |       |       |
| <i>Ommastrephes bartramii</i> (LeSueur, 1821)          | 0.00  | 0.00  | 0.00  | 0.00  | 0.00  | 0.07  |
| <i>Illex coindetii</i> (Verany, 1839)                  | 45.54 | 45.78 | 53.80 | 64.48 | 72.36 | 52.41 |
| <i>Todarodes sagittatus</i> (Lamarck 1798)             | 21.75 | 14.16 | 12.20 | 4.82  | 16.58 | 28.01 |
| <i>Todaropsis eblanae</i> (Ball, 1841)                 | 12.70 | 35.12 | 27.87 | 20.35 | 5.28  | 43.12 |
| <b>Family Histioteuthidae</b>                          |       |       |       |       |       |       |
| <i>Histioteuthis bonnellii</i> (Férussac, 1835)        | 3.22  | 6.49  | 6.83  | 1.38  | 0.25  | 7.27  |
| <i>Histioteuthis reversa</i> (Verrill, 1880)           | 4.40  | 6.36  | 14.36 | 2.25  | 1.01  | 2.66  |
| <i>Histioteuthis spp.</i> <sup>3</sup>                 | 0.10  | 0.00  | 0.07  | 0.02  | 0.00  | 0.94  |

|                                                     |       |       |       |      |       |       |
|-----------------------------------------------------|-------|-------|-------|------|-------|-------|
| <b>Family Onychoteuthidae</b>                       |       |       |       |      |       |       |
| <i>Ancistroteuthis lichtensteinii</i> Orbigny, 1839 | 4.32  | 0.80  | 3.97  | 0.11 | 0.75  | 0.07  |
| <i>Onychoteuthis banksii</i> (Leach, 1817)          | 0.50  | 0.11  | 0.63  | 0.09 | 0.50  | 0.29  |
| <b>Family Enoploteuthidae</b>                       |       |       |       |      |       |       |
| <i>Abralia veranyi</i> (Rüppell, 1844)              | 9.18  | 10.76 | 21.53 | 3.07 | 1.26  | 16.27 |
| <i>Abraliopsis morisii</i> (Vérany, 1839)           | 0.00  | 0.00  | 0.07  | 0.00 | 0.00  | 0.00  |
| Unid. Enoploteuthidae                               | 0.00  | 0.00  | 0.00  | 0.00 | 0.75  | 0.00  |
| <b>Family Ctenopterygidae</b>                       |       |       |       |      |       |       |
| <i>Ctenopteryx sicula</i> (Veranyi, 1851)           | 0.00  | 0.03  | 0.07  | 0.00 | 0.00  | 0.00  |
| <b>Family Octopoteuthidae</b>                       |       |       |       |      |       |       |
| <i>Octopoteuthis sicula</i> Rüppell, 1844           | 0.00  | 0.00  | 0.42  | 0.00 | 0.25  | 0.00  |
| <b>Family Chiroteuthidae</b>                        |       |       |       |      |       |       |
| <i>Chiroteuthis veranii</i> (Férussac, 1835)        | 0.00  | 0.02  | 0.70  | 0.00 | 0.00  | 0.00  |
| <b>Family Ancistrocheiridae</b>                     |       |       |       |      |       |       |
| <i>Ancistrocheirus lesueurii</i> (Orbigny, 1842)    | 0.00  | 0.00  | 0.28  | 0.00 | 0.00  | 0.00  |
| <b>Family Brachioteuthidae</b>                      |       |       |       |      |       |       |
| <i>Brachioteuthis riisei</i> (Steenstrup, 1882)     | 0.78  | 0.00  | 0.35  | 0.00 | 0.75  | 0.00  |
| <b>Family Pyroteuthidae</b>                         |       |       |       |      |       |       |
| <i>Pyroteuthis margaritifera</i> (Rüppell, 1844)    | 0.00  | 0.00  | 0.21  | 0.00 | 0.00  | 0.00  |
|                                                     |       |       |       |      |       |       |
| <b>ORDER OCTOPODA</b>                               |       |       |       |      |       |       |
| <b>Family Octopodidae</b>                           |       |       |       |      |       |       |
| <i>Octopus vulgaris</i> Cuvier, 1798                | 34.60 | 21.63 | 16.52 | 9.39 | 29.40 | 16.70 |
| <i>Callistoctopus macropus</i> Risso, 1826          | 0.25  | 0.42  | 0.28  | 0.48 | 0.00  | 0.36  |

|                                                       |       |       |       |       |       |       |
|-------------------------------------------------------|-------|-------|-------|-------|-------|-------|
| <i>Octopus salutii</i> (Verany, 1839)                 | 10.91 | 12.50 | 7.25  | 6.06  | 0.50  | 8.35  |
| <i>Macrotritopus defilippi</i> (Vérany, 1851)         | 2.29  | 0.88  | 0.07  | 0.39  | 0.00  | 0.36  |
| <i>Octopus spp.</i>                                   | 0.08  | 0.16  | 0.00  | 0.13  | 0.00  | 0.07  |
| <i>Pteroctopus tetracirrhus</i> (Delle Chiaje, 1830)  | 6.21  | 16.08 | 4.74  | 1.08  | 2.76  | 10.37 |
| <i>Scaevargus unircirrhus</i> (Orbigny, 1840)         | 7.87  | 23.61 | 21.39 | 3.40  | 28.39 | 25.99 |
| <i>Bathypolypus sponsalis</i> (P. & H. Fischer, 1892) | 9.38  | 3.87  | 0.14  | 0.00  | 0.00  | 0.65  |
| <i>Eledone cirrhosa</i> (Lamarck, 1798)               | 62.91 | 63.41 | 27.32 | 36.97 | 18.34 | 30.09 |
| <i>Eledone moschata</i> (Lamarck, 1798)               | 18.83 | 13.91 | 11.92 | 33.85 | 33.17 | 24.91 |
| <b>Family Ocythoidea</b>                              |       |       |       |       |       |       |
| <i>Ocythoe tuberculata</i> Rafinesque, 1814           | 0.03  | 0.00  | 0.00  | 0.00  | 0.00  | 0.00  |
| <b>Family Argonautidae</b>                            |       |       |       |       |       |       |
| <i>Argonauta argo</i> Linnaeus, 1758                  | 0.00  | 0.00  | 0.14  | 0.00  | 0.00  | 0.29  |
| <b>Family Opisthoteuthidae</b>                        |       |       |       |       |       |       |
| <i>Opisthoteuthis calypso</i> Villanueva et al., 2002 | 0.08  | 0.00  | 0.00  | 0.00  | 0.00  | 0.00  |
| <i>Opisthoteuthis spp.</i>                            | 0.03  | 0.00  | 0.00  | 0.00  | 0.00  | 0.00  |

<sup>1</sup> all three groups joined to "Alloteuthis"
