# Supplementary material for: Large-Scale Spatio-Temporal Patterns of Mediterranean Cephalopod Diversity
Source: PubMed Central journal article supplement (PMC4712019; doi:10.1371/journal.pone.0146469), 2016-01-13
Supplement: pone.0146469.s005.pdf [file pone.0146469.s005.pdf]

Table S2: Best model selection for H' and S based on explained variance, GCV and AIC. All variables shown in the model formulations were significant. Best model marked in bold.

| No       | Model                                                                          | R2          | GCV            | k            | AIC         |
|----------|--------------------------------------------------------------------------------|-------------|----------------|--------------|-------------|
| 1        | H' ~ Year +Region +s(lat, long)+ depth                                         | 15.8        | 0.18087        | -            | 7079        |
| 2        | H' ~ Year +s(lat, long)+ depth * region                                        | 18.2        | 0.17627        | -            | 6917        |
| 3        | H' ~ Year +s(lat, long)+ depth * region + s(Chl Spring) + s(SST Spring)        | 18.3        | 0.17626        | K=4/4        | 6916        |
| 4        | H' ~ Year +s(lat, long)+ depth * region + s(Chl Spring) + s(SST Winter)        | 18.4        | 0.17583        | K=4/4        | 6901        |
| 5        | H' ~ Year +s(lat, long)+ depth * region + s(Chl Winter) + s(SST Spring)        | 18.5        | 0.17577        | K=4/4        | 6899        |
| <b>6</b> | <b>H' ~ Year +s(lat, long)+ depth * region + s(Chl Winter) + s(SST Winter)</b> | <b>18.5</b> | <b>0.17572</b> | <b>K=4/4</b> | <b>6897</b> |

| No        | Model                                                                         | R2          | GCV           | k             | AIC          |
|-----------|-------------------------------------------------------------------------------|-------------|---------------|---------------|--------------|
| 7         | S ~ Year +Region + s(lat, long)+ depth + region                               | 33.2        | 2.6188        | -             | 23850        |
| 8         | S ~ Year +s(lat, long)+ depth * region                                        | 35.5        | 2.5419        | -             | 23662        |
| 9         | S ~ Year +s(lat, long)+ depth * region + s(Chl Spring) + s(SST Spring)        | 35.6        | 2.5371        | K=4 /4        | 23650        |
| 10        | S ~ Year +s(lat, long)+ depth * region + s(Chl Spring) + s(SST Winter)        | 35.5        | 2.5417        | k=4 /4        | 23662        |
| <b>11</b> | <b>S ~ Year +s(lat, long)+ depth * region + s(Chl Winter) + s(SST Spring)</b> | <b>35.9</b> | <b>2.5275</b> | <b>K=4 /4</b> | <b>23627</b> |
| 12        | S ~ Year +s(lat, long)+ depth * region + s(Chl Winter) + s(SST Winter)        | 35.8        | 2.5313        | k=4 /4        | 23636        |
